# Supplementary material for: Ce promoted Pd–Nb catalysts for γ-valerolactone ring-opening and hydrogenation
Source: Royal Society of Chemistry journal article supplement (doi:10.1039/c2gc36161b), 2012-01-01
Supplement: c2gc36161b.pdf [file c2gc36161b.pdf]

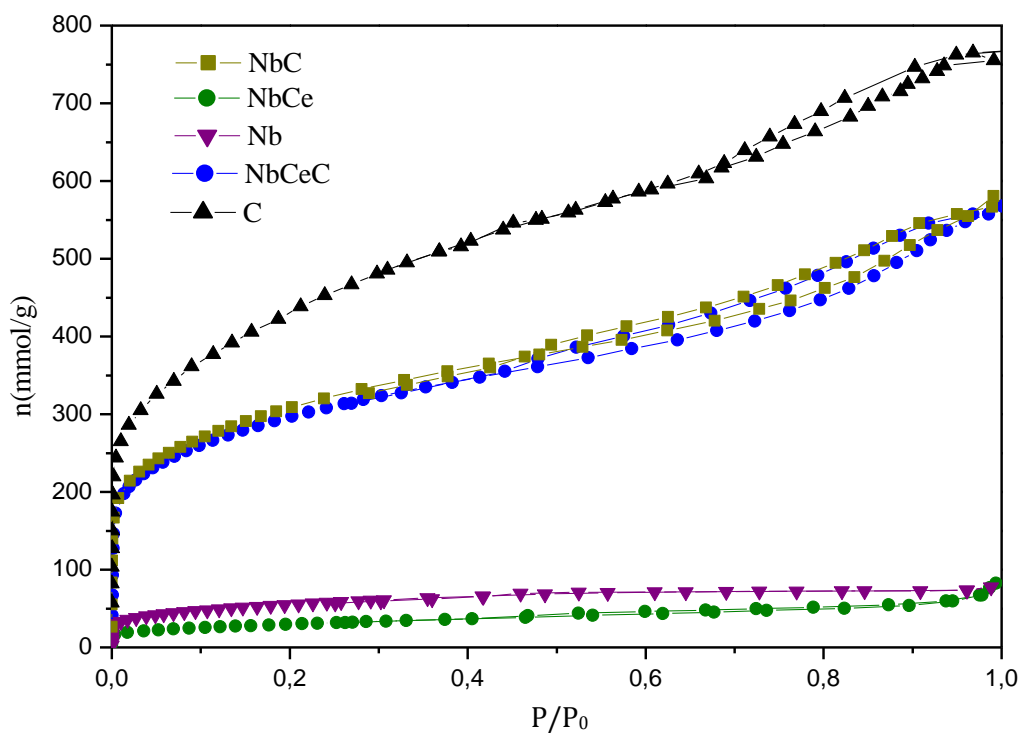

N<sub>2</sub> adsorption isotherms at 77 K on the different supports. Similar results were obtained after Pd impregnation
